# Supplementary material
Source: ML conference proceedings conference paper supplement (https://openreview.net/forum?id=OQ3UDi28E-)

Errors

0.8

0.6

0.4

1

5

10

15

20

25

30

Epochs

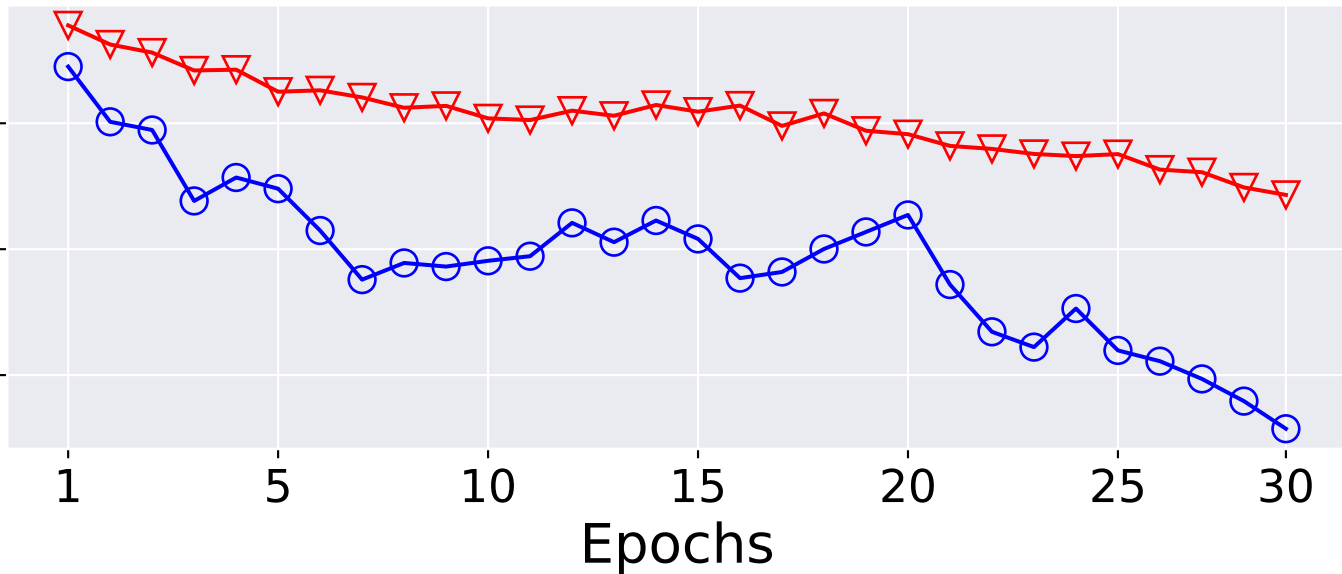

Supplement: supplementary_material [file attachment]

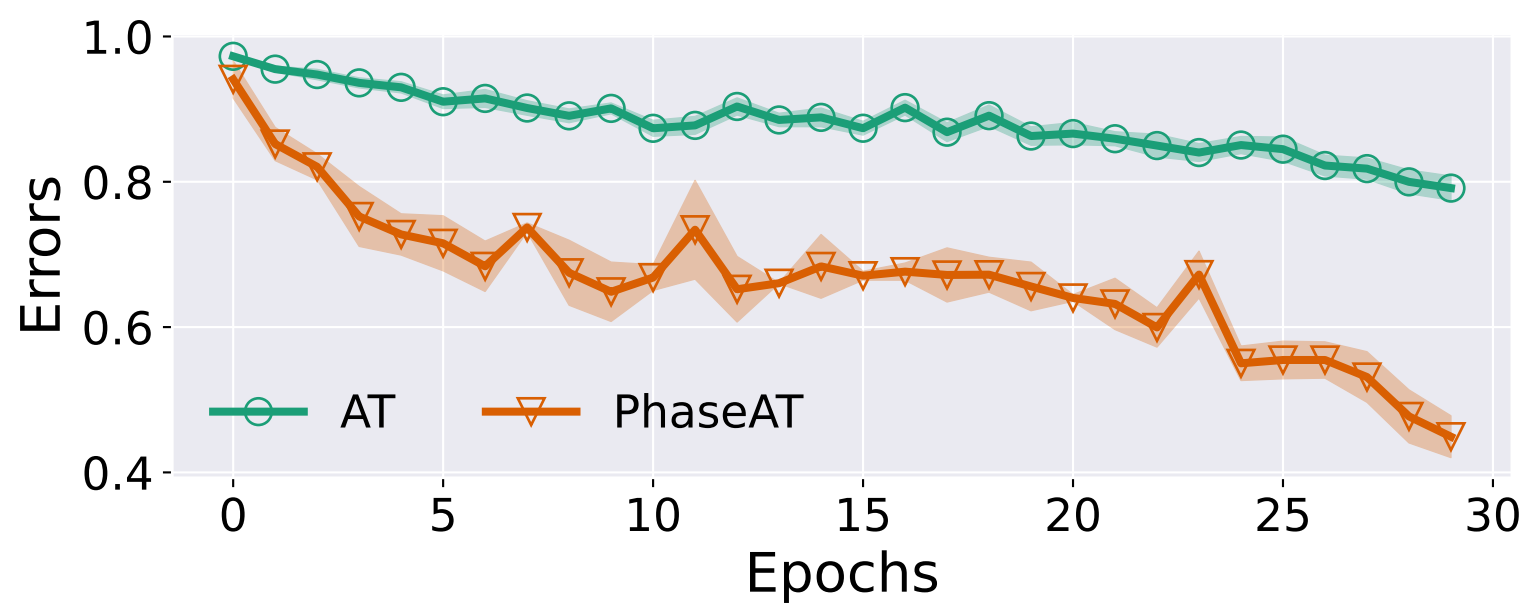

Supplement: supplementary_material [file attachment]

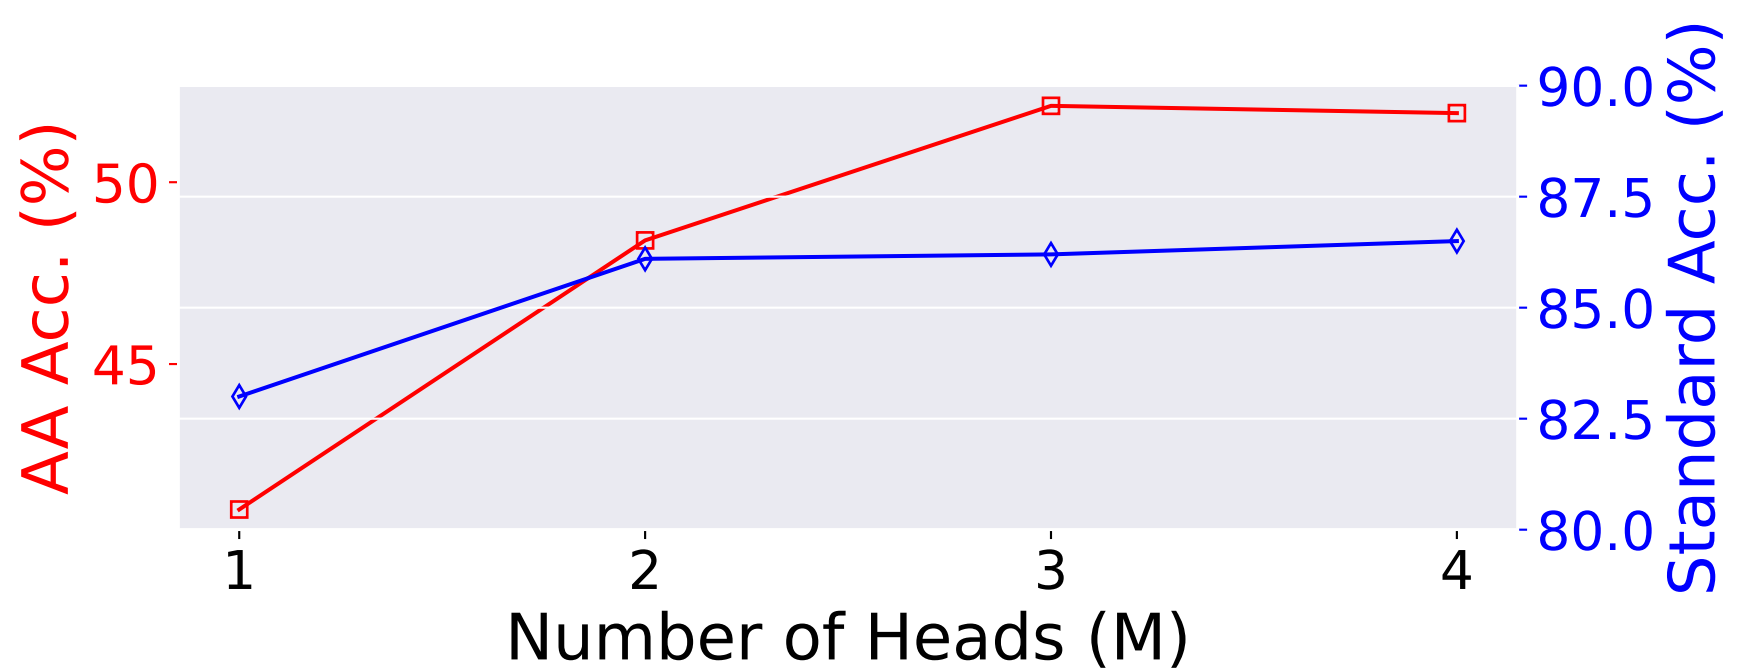

Supplement: supplementary_material [file attachment]

—○— Standard training

—▽— Adversarial training

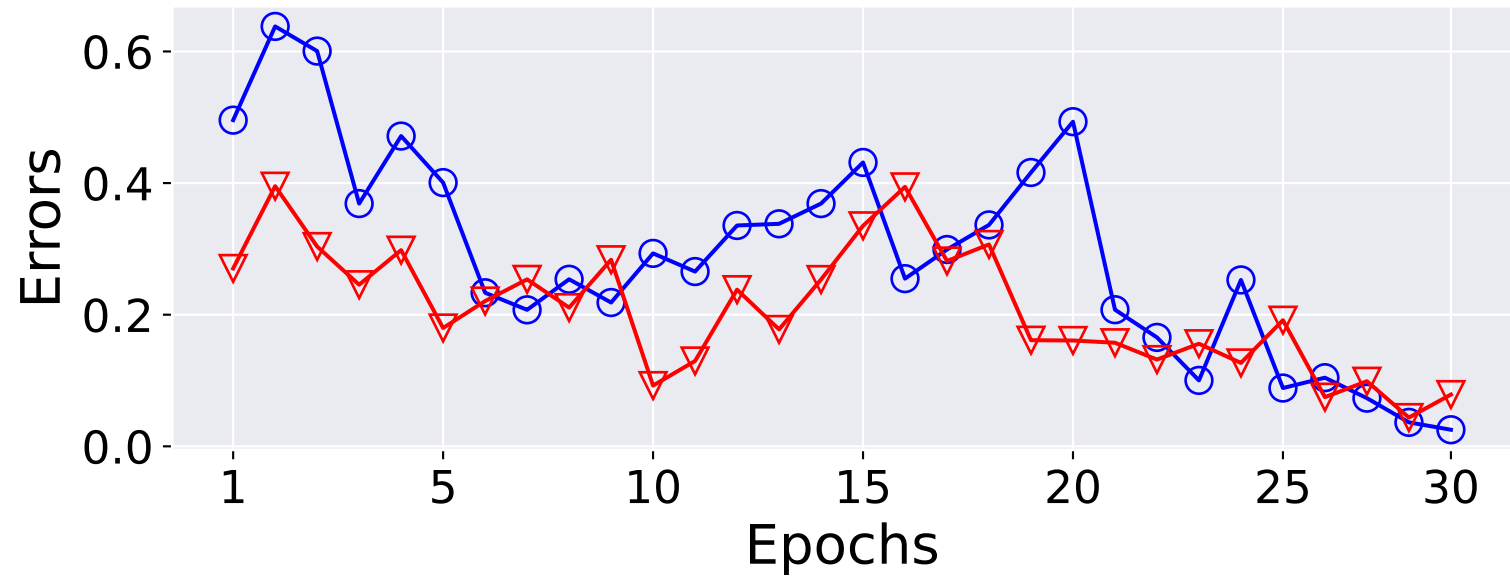

Supplement: supplementary_material [file attachment]

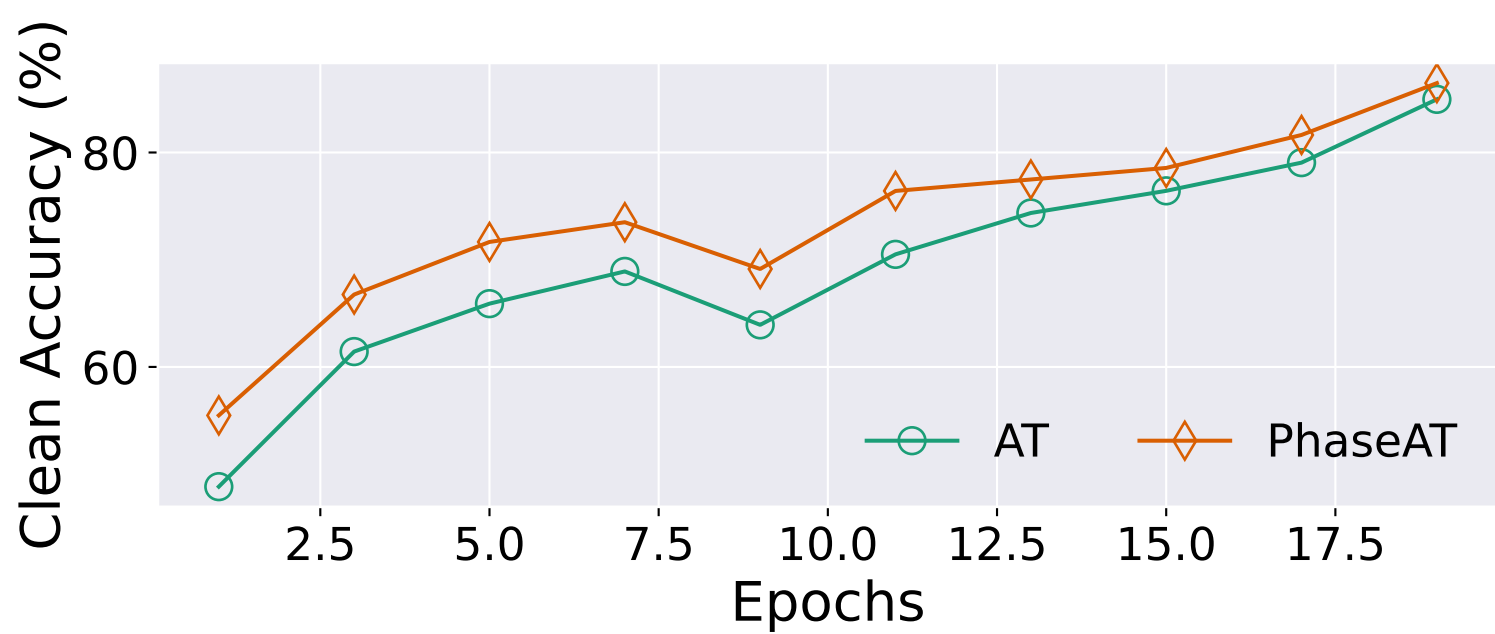

Supplement: supplementary_material [file attachment]

Errors

1.0

0.5

0

5

10

15

20

25

30

Epochs

AT

PhaseAT

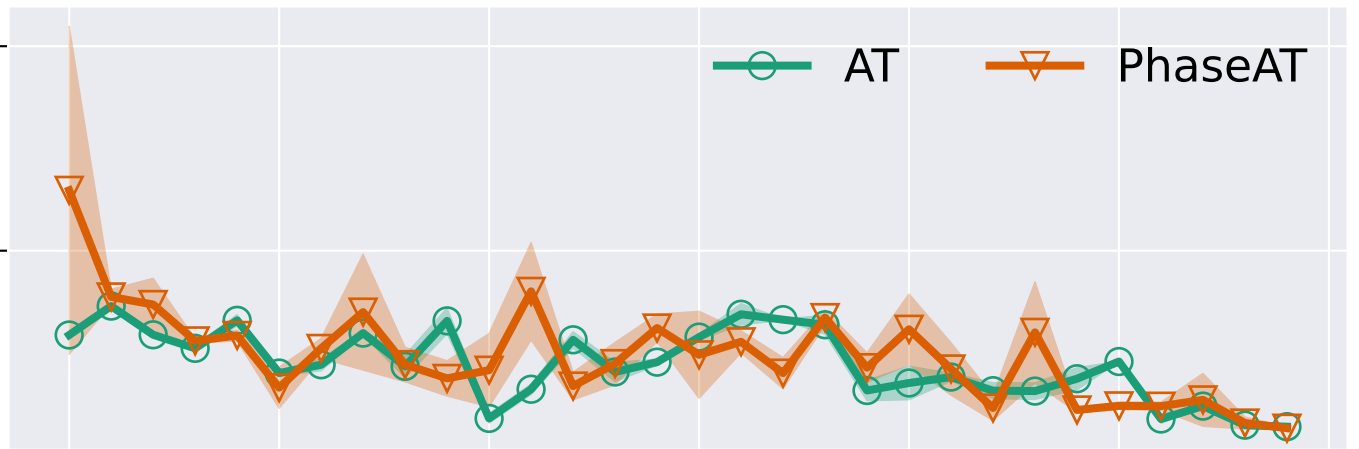

Supplement: supplementary_material [file attachment]

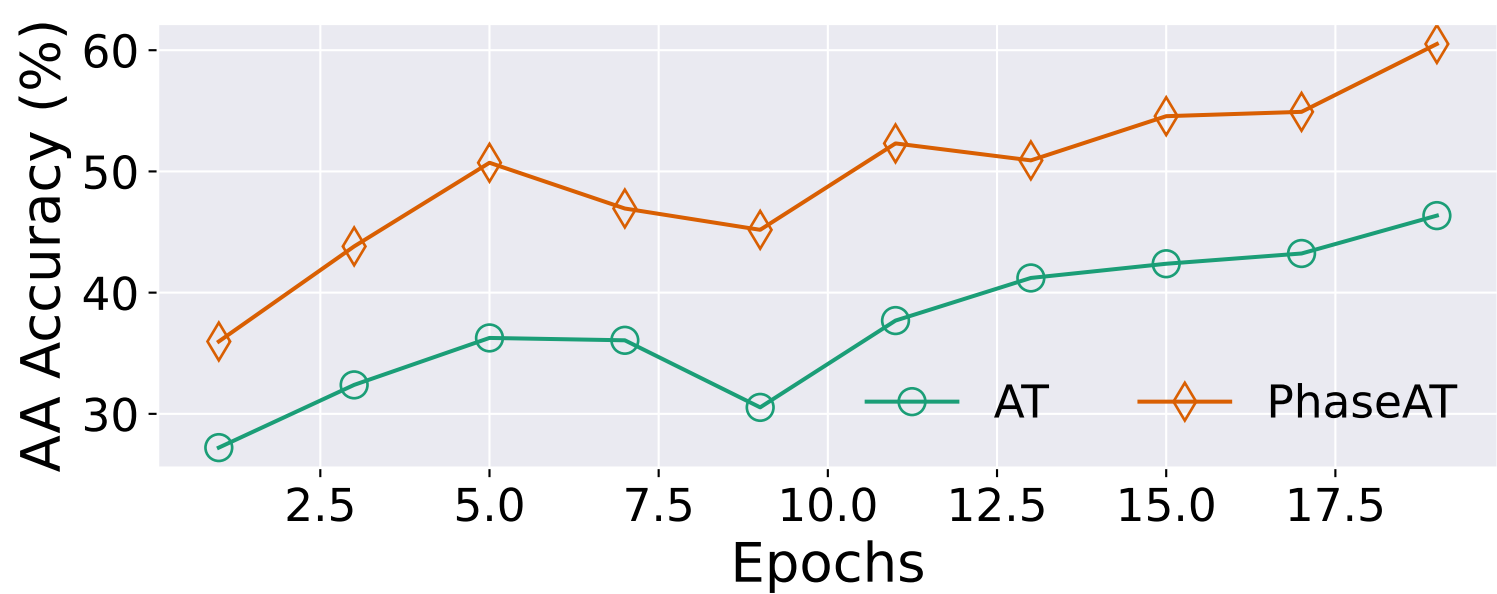

Supplement: supplementary_material [file attachment]

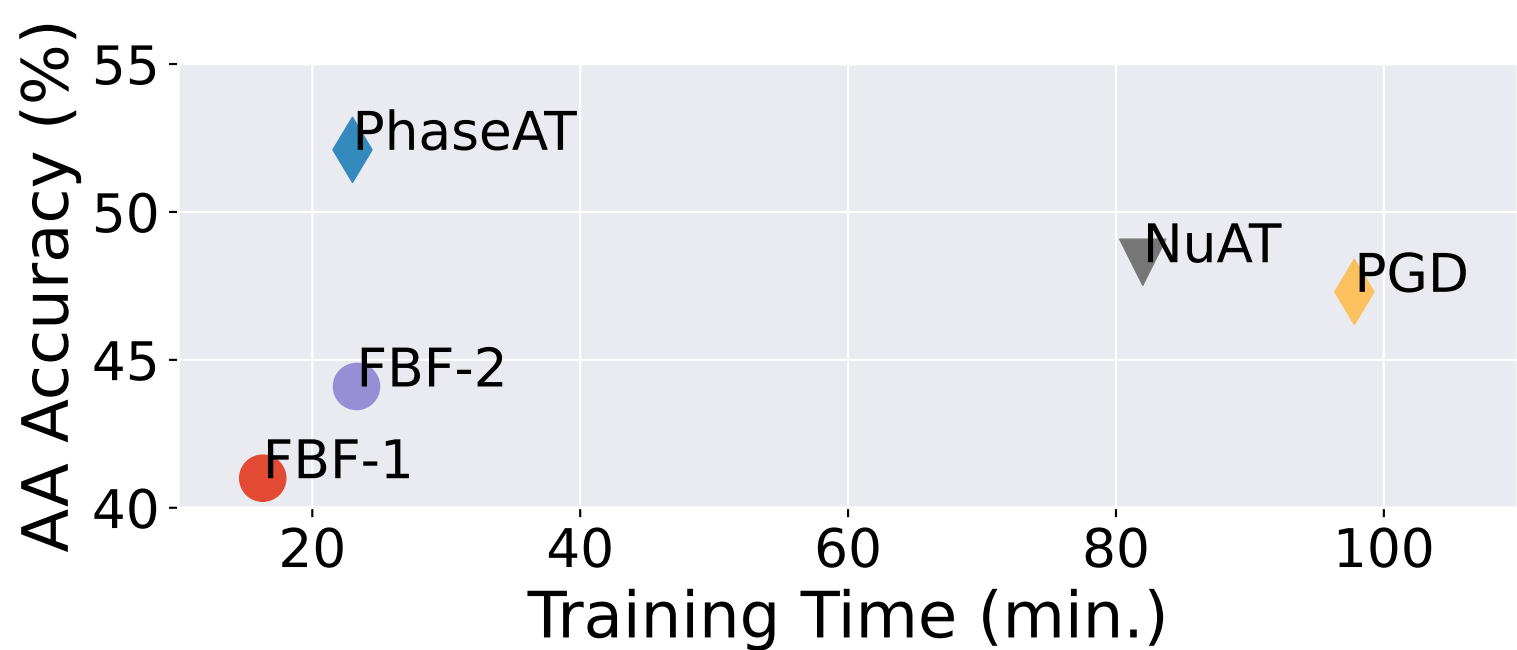

Supplement: supplementary_material [file attachment]

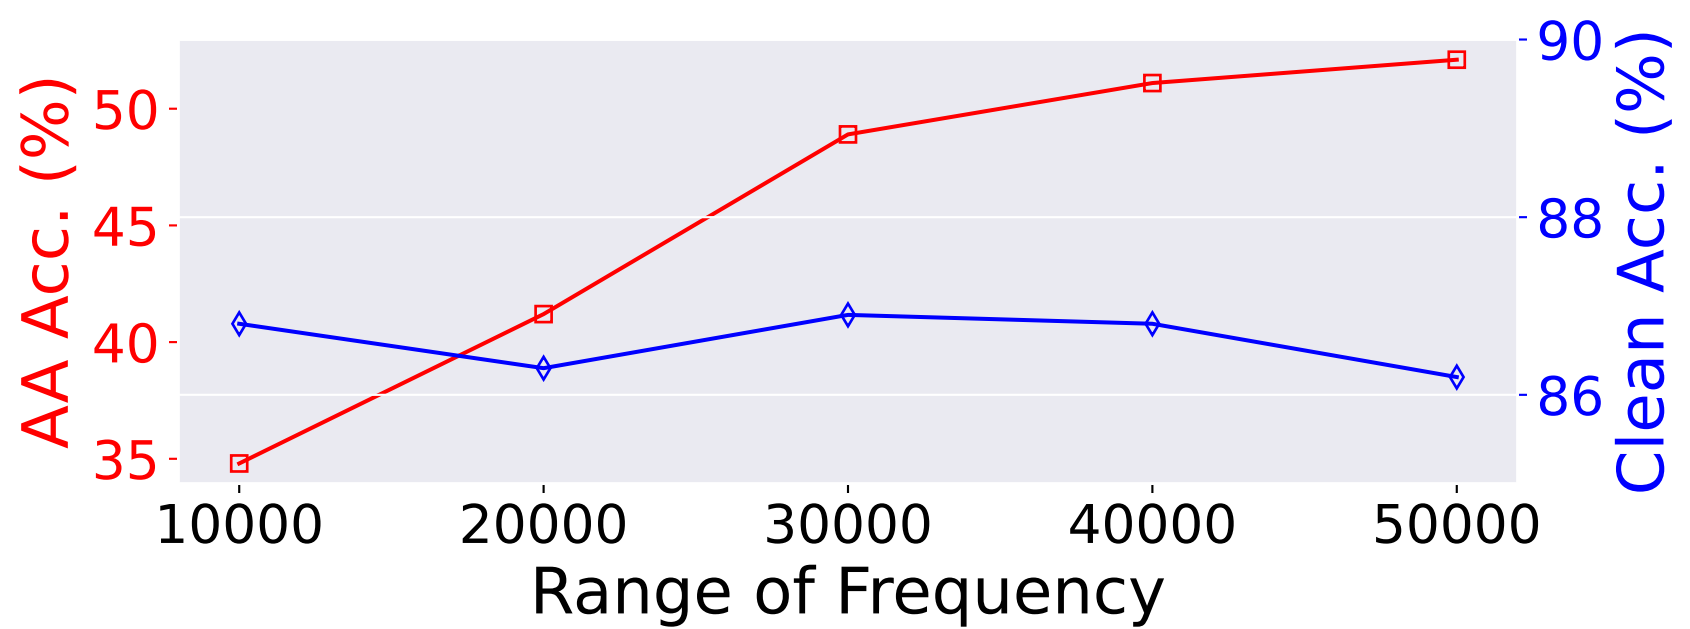

Supplement: supplementary_material [file attachment]
